# Supplementary material for: High-Accuracy Renal Cell Carcinoma Discrimination through Label-Free SERS of Blood Serum and Multivariate Analysis
Source: MDPI journal article supplement (doi:10.3390/bios13080813), 2023-08-13

# Supplementary Materials

**Supplementary Table S1.** Demographic data and tumor-related information of the renal cell carcinoma patients enrolled in the study.

| Number | Age (years) | Sex | Tumor histology      | TNM     | Stage | ISUP grade | Intratumoral necrosis | Intratumoral bleeding |
|--------|-------------|-----|----------------------|---------|-------|------------|-----------------------|-----------------------|
| 1      | 66          | M   | Clear cell carcinoma | T1bN0M0 | 1     | 3          | Yes                   | No                    |
| 2      | 76          | M   | Clear cell carcinoma | T3aN0M0 | 3     | 4          | Yes                   | Yes                   |
| 3      | 73          | M   | Clear cell carcinoma | T1aN0M0 | 1     | 1          | No                    | No                    |
| 4      | 44          | M   | Clear cell carcinoma | T1aN0M0 | 1     | 2          | No                    | Yes                   |
| 5      | 73          | M   | Clear cell carcinoma | T3aN0M0 | 3     | 2          | No                    | Yes                   |
| 6      | 62          | M   | Clear cell carcinoma | T1bN0M0 | 1     | 2          | Yes                   | Yes                   |
| 7      | 56          | M   | Clear cell carcinoma | T1bN0M0 | 1     | 2          | No                    | Yes                   |
| 8      | 64          | M   | Clear cell carcinoma | T1aN0M0 | 1     | 1          | No                    | No                    |
| 9      | 77          | M   | Clear cell carcinoma | T2aN0M0 | 2     | 2          | No                    | No                    |
| 10     | 67          | M   | Clear cell carcinoma | T1bN0M0 | 1     | 2          | No                    | No                    |
| 11     | 60          | M   | Clear cell carcinoma | T1aN0M0 | 1     | 2          | No                    | Yes                   |
| 12     | 59          | M   | Clear cell carcinoma | T1aN0M0 | 1     | 2          | No                    | Yes                   |
| 13     | 72          | M   | Clear cell carcinoma | T2aN0M0 | 2     | 3          | Yes                   | Yes                   |
| 14     | 67          | M   | Clear cell carcinoma | T3aN0M0 | 3     | 4          | Yes                   | Yes                   |
| 15     | 75          | M   | Clear cell carcinoma | T2aN0M0 | 2     | 2          | No                    | Yes                   |
| 16     | 47          | M   | Clear cell carcinoma | T2aN0M0 | 2     | 1          | Yes                   | Yes                   |
| 17     | 61          | M   | Clear cell carcinoma | T2aN0M0 | 2     | 2          | No                    | Yes                   |
| 18     | 55          | M   | Clear cell carcinoma | T1aN0M0 | 1     | 2          | No                    | Yes                   |
| 19     | 61          | M   | Clear cell carcinoma | T1aN0M0 | 1     | 2          | No                    | No                    |
| 20     | 64          | M   | Clear cell carcinoma | T3aN0M0 | 3     | 2          | Yes                   | Yes                   |

|    |    |   |                      |         |   |   |     |     |
|----|----|---|----------------------|---------|---|---|-----|-----|
| 21 | 54 | M | Clear cell carcinoma | T1aN0M0 | 1 | 2 | No  | Yes |
| 22 | 62 | M | Clear cell carcinoma | T1bN0M0 | 1 | 4 | Yes | Yes |
| 23 | 53 | M | Clear cell carcinoma | T2aN0M0 | 2 | 2 | No  | Yes |
| 24 | 60 | M | Clear cell carcinoma | T2aN0M0 | 2 | 3 | No  | Yes |
| 25 | 64 | M | Clear cell carcinoma | T1bN0M0 | 1 | 1 | Yes | Yes |
| 26 | 60 | M | Clear cell carcinoma | T2aN0M0 | 2 | 1 | No  | Yes |
| 27 | 44 | M | Clear cell carcinoma | T1bN0M0 | 1 | 3 | No  | No  |
| 28 | 66 | M | Clear cell carcinoma | T1aN0M0 | 1 | 1 | No  | Yes |
| 29 | 38 | M | Clear cell carcinoma | T1aN0M0 | 1 | 1 | No  | No  |
| 30 | 59 | M | Clear cell carcinoma | T3aN0M0 | 3 | 2 | Yes | Yes |
| 31 | 69 | M | Clear cell carcinoma | T1bN0M0 | 1 | 2 | No  | Yes |
| 32 | 74 | M | Clear cell carcinoma | T1bN0M0 | 1 | 2 | Yes | Yes |
| 33 | 76 | M | Clear cell carcinoma | T2aN0M0 | 2 | 2 | Yes | Yes |
| 34 | 72 | M | Clear cell carcinoma | T1aN0M0 | 1 | 2 | No  | Yes |
| 35 | 70 | M | Clear cell carcinoma | T1bN0M0 | 1 | 1 | No  | Yes |
| 36 | 69 | M | Clear cell carcinoma | T1bN0M0 | 1 | 1 | Yes | Yes |
| 37 | 57 | M | Clear cell carcinoma | T1aN0M0 | 1 | 2 | No  | No  |
| 38 | 56 | M | Clear cell carcinoma | T1bN0M0 | 1 | 1 | No  | Yes |
| 39 | 63 | M | Clear cell carcinoma | T2aN0M0 | 2 | 2 | No  | Yes |
| 40 | 78 | M | Clear cell carcinoma | T1aN0M0 | 1 | 2 | No  | Yes |
| 41 | 64 | M | Clear cell carcinoma | T3aN0M0 | 3 | 4 | Yes | Yes |
| 42 | 65 | M | Clear cell carcinoma | T1aN0M0 | 1 | 2 | No  | Yes |
| 43 | 56 | M | Clear cell carcinoma | T3aN0M0 | 3 | 2 | Yes | Yes |
| 44 | 70 | M | Clear cell carcinoma | T1aN0M0 | 1 | 2 | No  | Yes |

|    |    |   |                      |         |   |   |     |     |
|----|----|---|----------------------|---------|---|---|-----|-----|
| 45 | 50 | M | Clear cell carcinoma | T1aN0M0 | 1 | 2 | No  | No  |
| 46 | 69 | M | Clear cell carcinoma | T1aN0M0 | 1 | 2 | No  | Yes |
| 47 | 41 | M | Clear cell carcinoma | T1aN0M0 | 1 | 1 | No  | No  |
| 48 | 54 | M | Clear cell carcinoma | T1bN0M0 | 1 | 4 | Yes | Yes |
| 49 | 48 | M | Clear cell carcinoma | T1aN0M0 | 1 | 2 | No  | Yes |
| 50 | 68 | M | Clear cell carcinoma | T2aN0M0 | 2 | 2 | No  | Yes |

**Supplementary Table S2.** Demographic data of control patients.

| Number | Age (Years) | Sex |
|--------|-------------|-----|
| 1      | 40          | M   |
| 2      | 57          | M   |
| 3      | 64          | M   |
| 4      | 79          | M   |
| 5      | 62          | M   |
| 6      | 48          | M   |
| 7      | 68          | M   |
| 8      | 68          | M   |
| 9      | 74          | M   |
| 10     | 60          | M   |
| 11     | 48          | M   |
| 12     | 38          | M   |
| 13     | 84          | M   |
| 14     | 53          | M   |
| 15     | 73          | M   |
| 16     | 59          | M   |
| 17     | 66          | M   |
| 18     | 19          | M   |
| 19     | 31          | M   |
| 20     | 72          | M   |
| 21     | 74          | M   |
| 22     | 19          | M   |
| 23     | 83          | M   |
| 24     | 45          | M   |
| 25     | 73          | M   |
| 26     | 54          | M   |
| 27     | 60          | M   |
| 28     | 65          | M   |
| 29     | 82          | M   |
| 30     | 68          | M   |
| 31     | 50          | M   |

|    |    |   |
|----|----|---|
| 32 | 60 | M |
| 33 | 74 | M |
| 34 | 73 | M |
| 35 | 88 | M |
| 36 | 62 | M |
| 37 | 52 | M |
| 38 | 70 | M |
| 39 | 66 | M |
| 40 | 62 | M |
| 41 | 26 | M |
| 42 | 64 | M |
| 43 | 59 | M |
| 44 | 51 | M |
| 45 | 53 | M |

**Figure S1.** SERS spectra of A: all samples in the 353-2533  $\text{cm}^{-1}$  spectral range, patients (RCC blue) and control (CTRL in red); B mean SERS intensities for the two maps

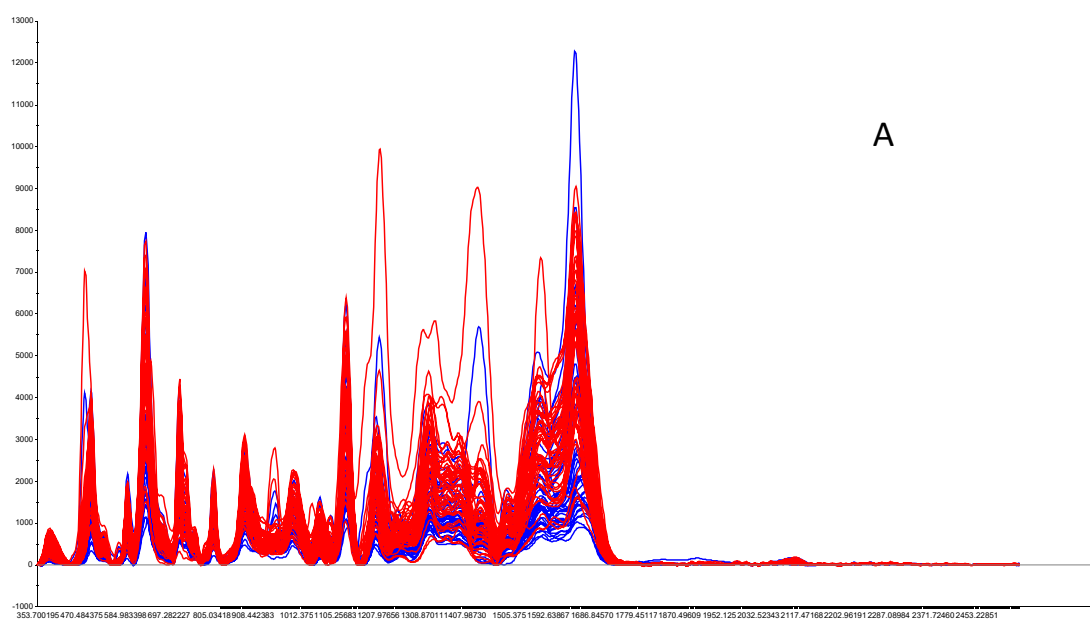

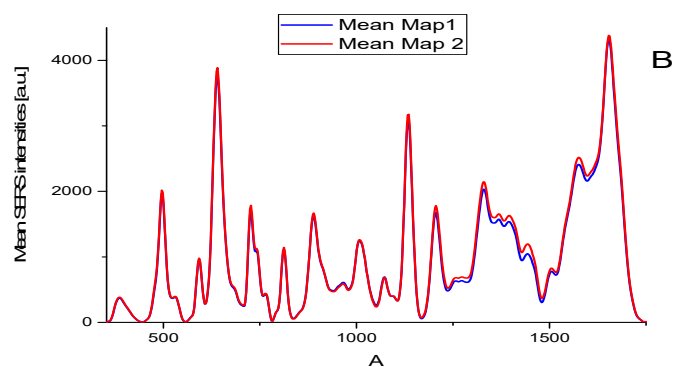

**Figure S2.** Coefficients of determination ( $R^2$ ) for the correlations between the SERS intensity measured at 640  $\text{cm}^{-1}$ , assigned to uric acid, and other most intense SERS vibration bands in the serum spectra.

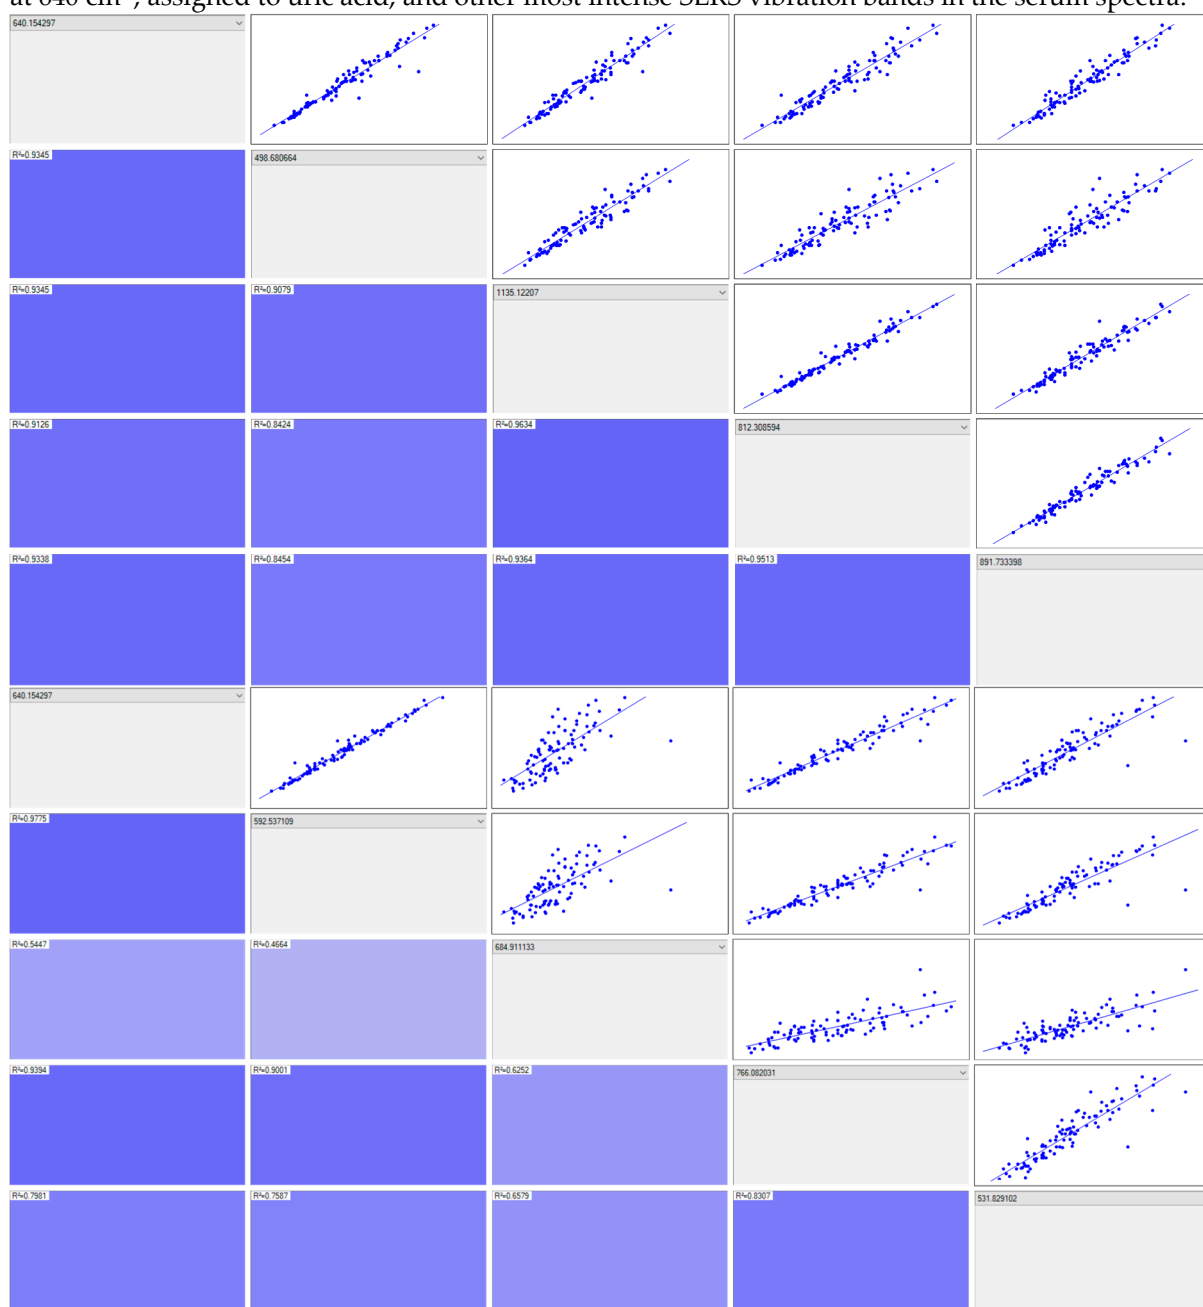

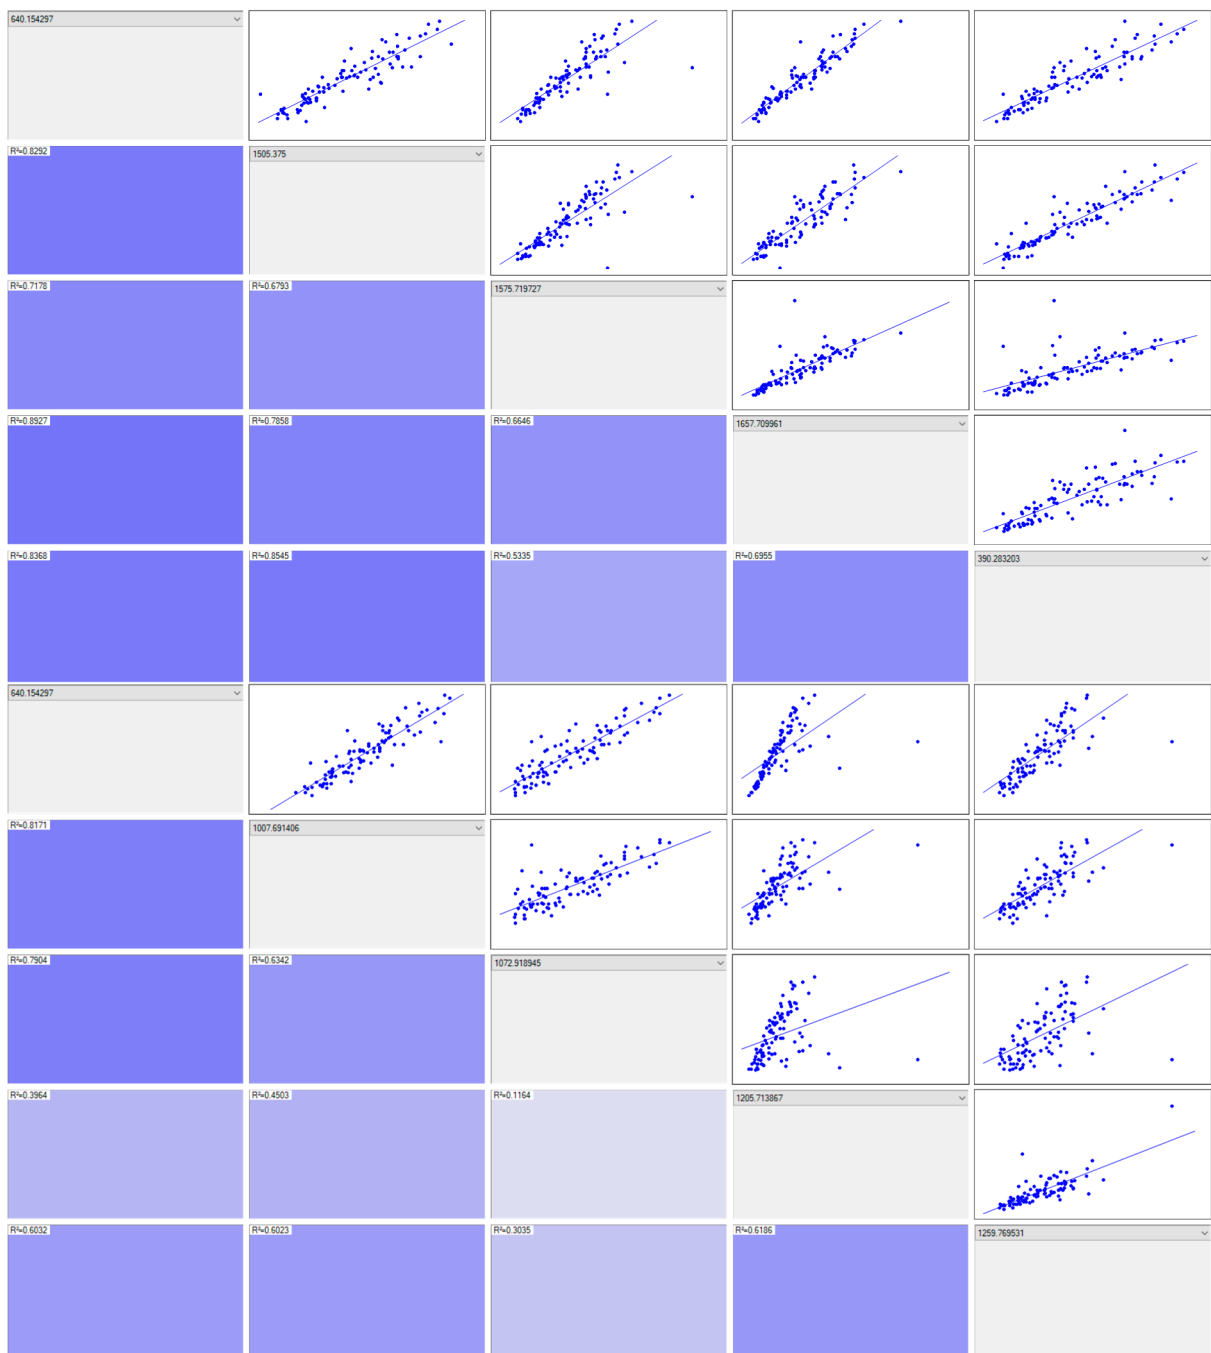

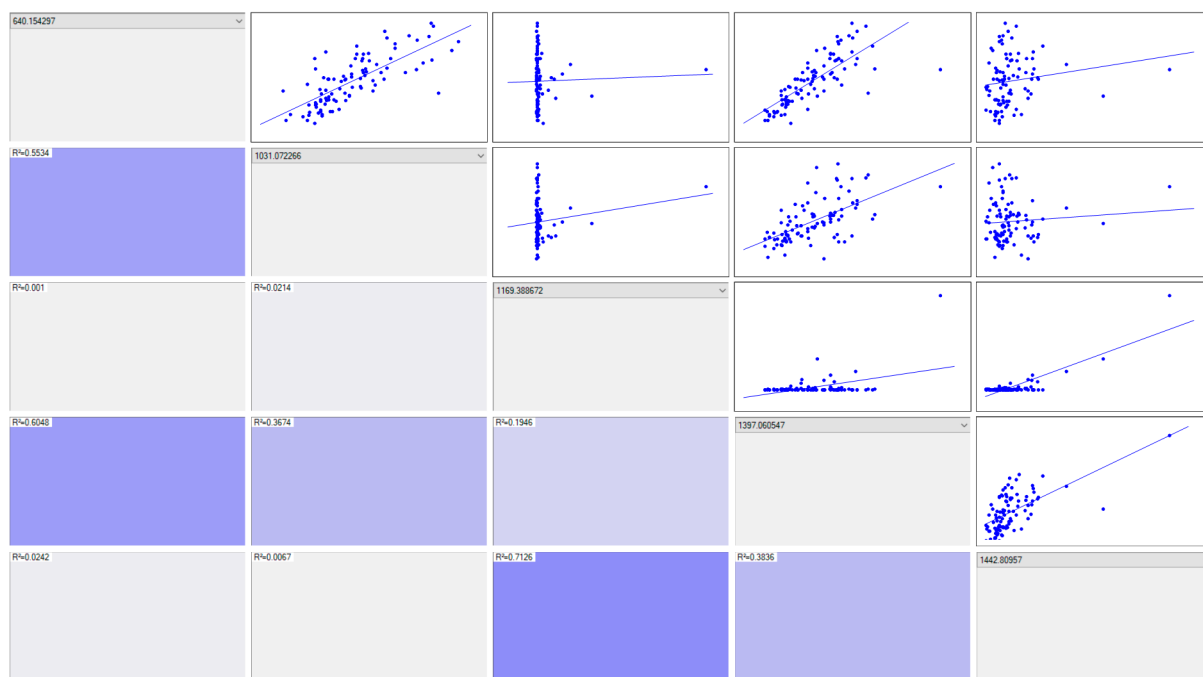

**Figure S3.** Coefficients of determination ( $R^2$ ) for the correlations between the SERS intensity measured at 727  $\text{cm}^{-1}$ , assigned to hypoxanthine, and other most intense SERS vibration bands in the serum spectra.

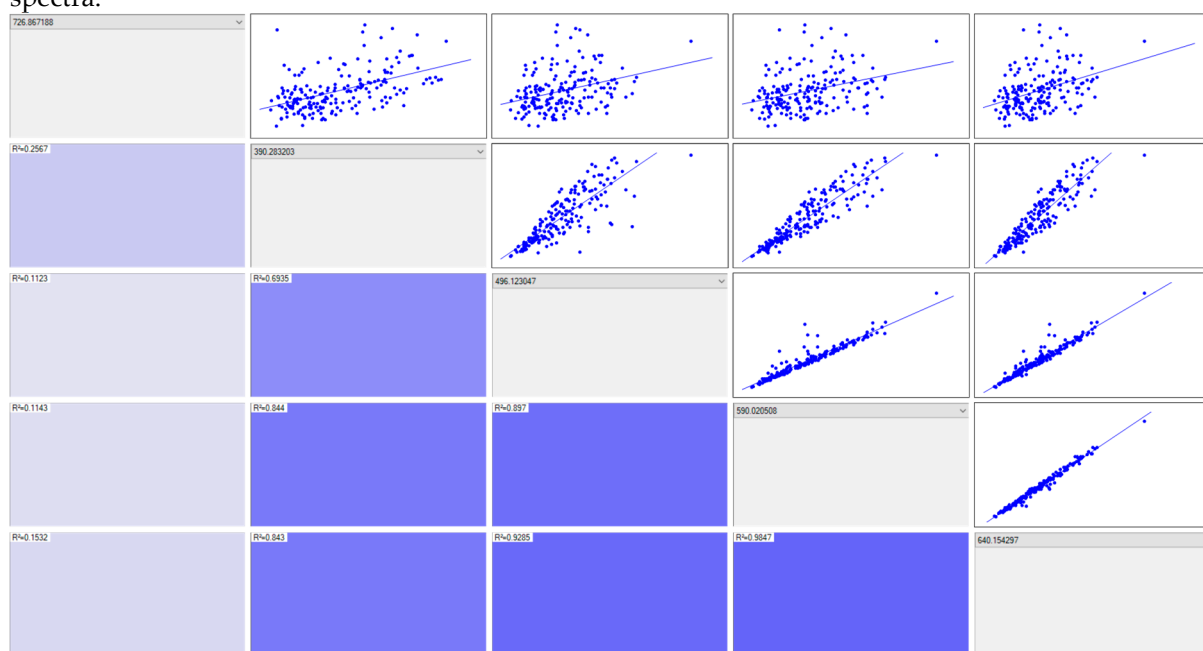

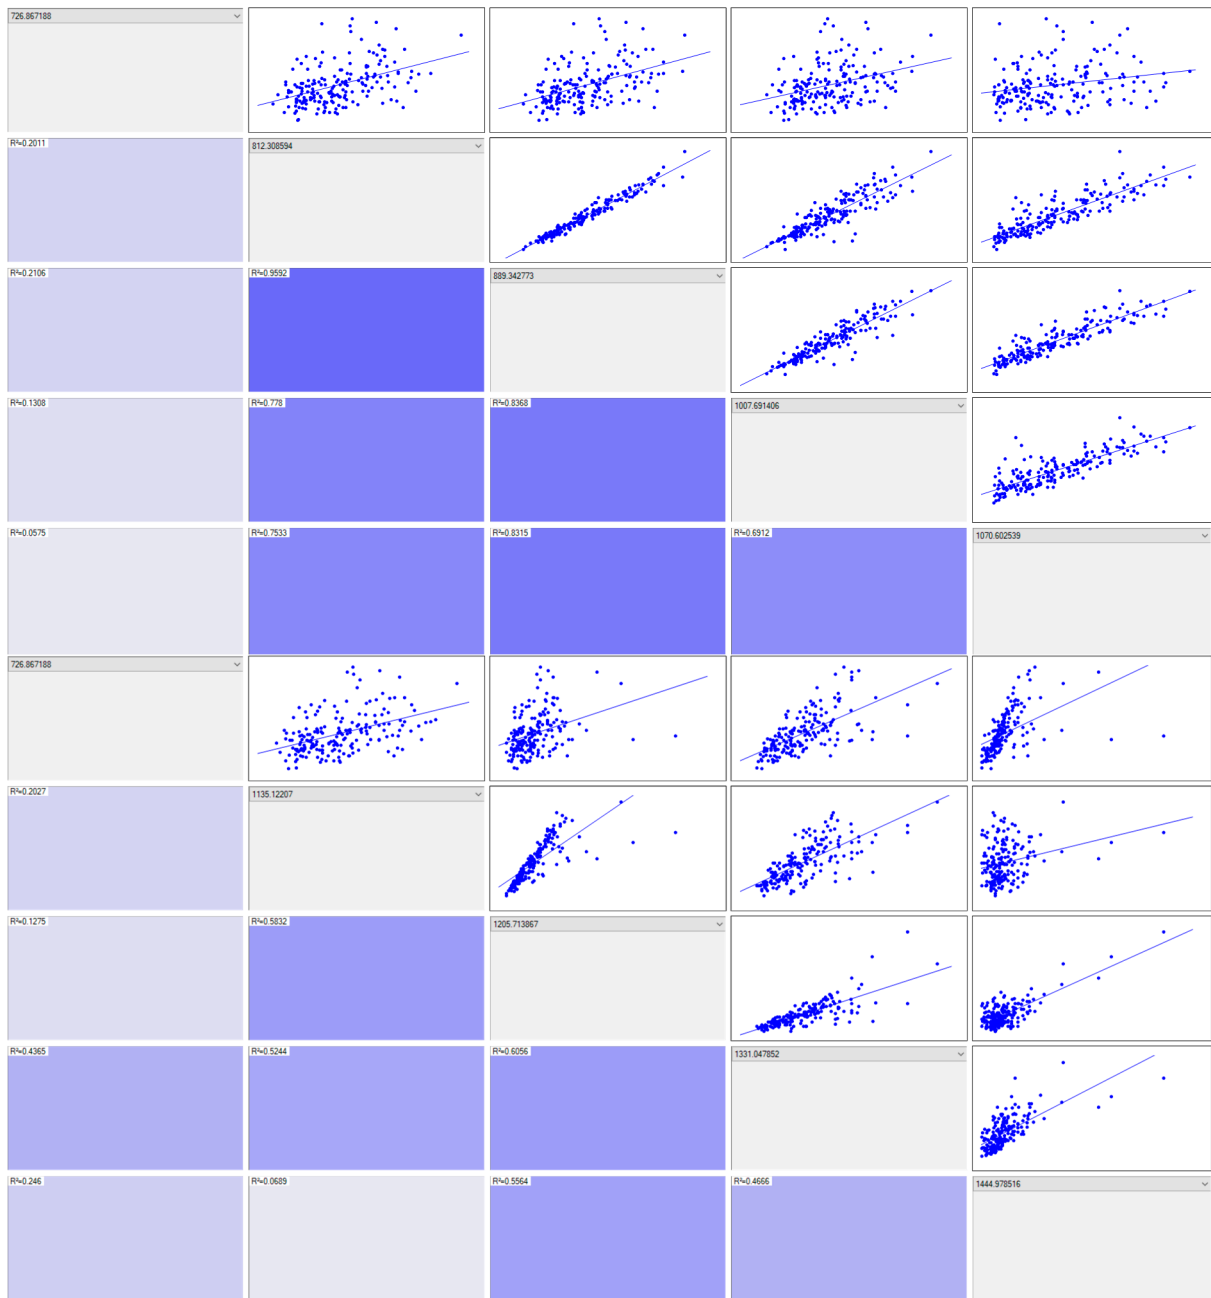



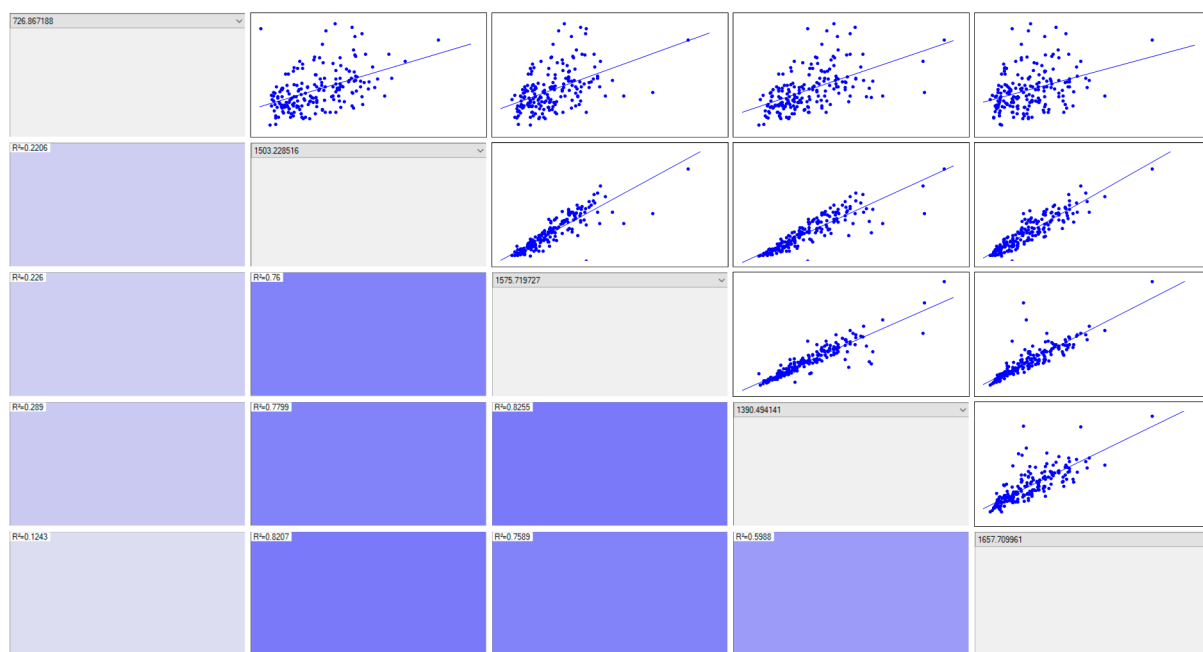

**Figure S4.** The coefficients of determination ( $R^2$ ) for the correlations between the SERS intensity measured at  $484\text{ cm}^{-1}$ , allegedly assigned to ergothioneine, and other SERS vibration assigned to the same compound.

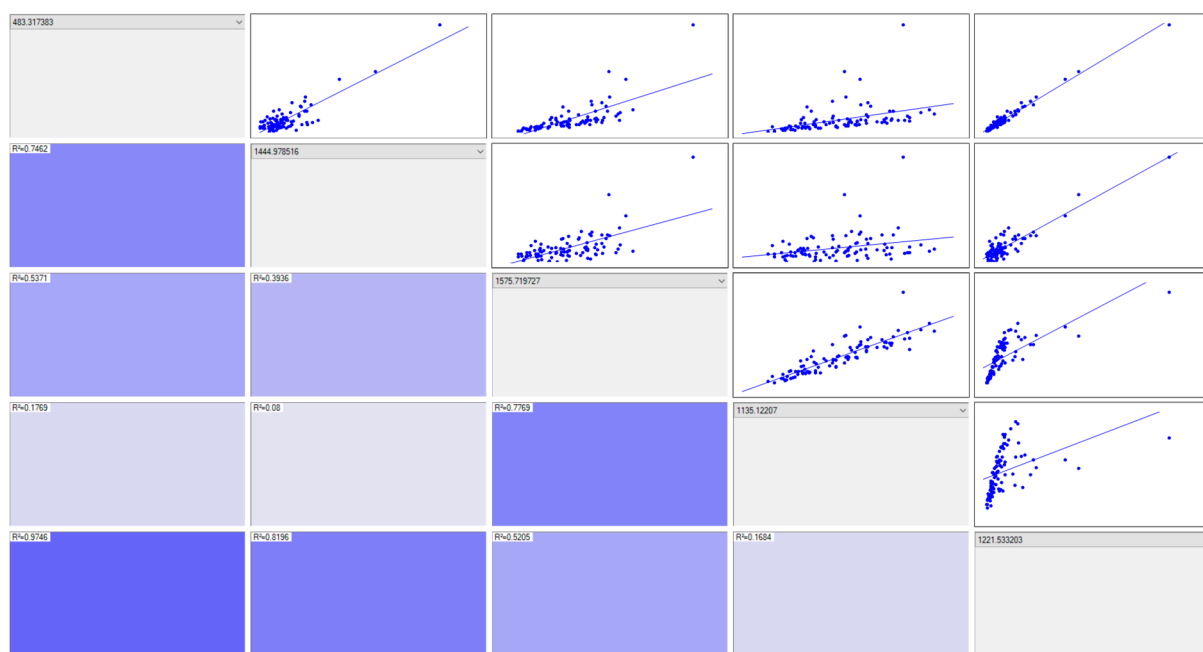

**Table S3.** The coefficients of determination ( $R^2$ ) for the correlations between the SERS intensity measured at  $484\text{ cm}^{-1}$ , allegedly assigned to ergothioneine, and other SERS vibration assigned to the same compound.

| Wavenumber<br>( $\text{cm}^{-1}$ ) | Coefficient of determination for the linear regression with $484\text{ cm}^{-1}$<br>( $R^2$ ) |
|------------------------------------|-----------------------------------------------------------------------------------------------|
| 1444.98                            | $R^2=0.7462$                                                                                  |
| 1575.72                            | $R^2=0.5442$                                                                                  |
| 1132.83                            | $R^2=0.2314$                                                                                  |
| 1214.76                            | $R^2=0.9526$                                                                                  |

**Figure S5.** Serum sample SERS in the range  $442\text{--}534\text{ cm}^{-1}$  (blue are controls and red RCC)

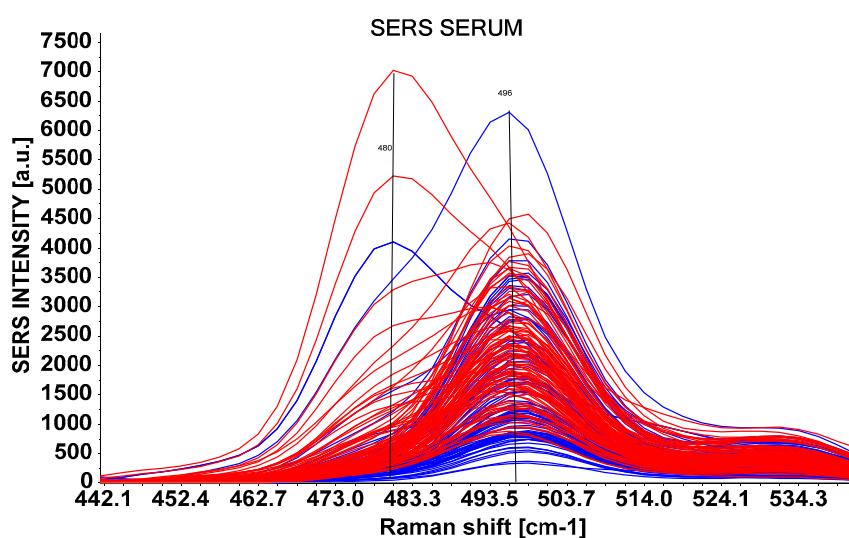

**Figure S6.** Mean SERS intensities comparison between the controls and RCC samples for two wavenumbers: 640  $\text{cm}^{-1}$  and 727  $\text{cm}^{-1}$

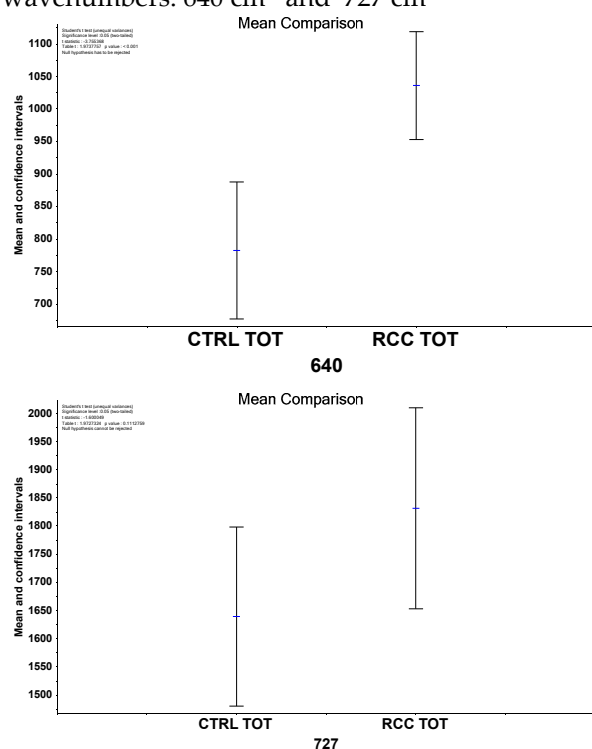

**Figure S7.** Explained variance for PCA with 12 principal components

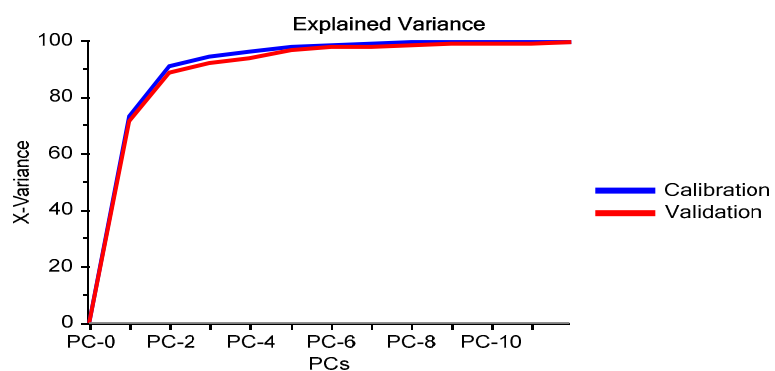

**Figure S8** Loading plot for PC2 for raw data

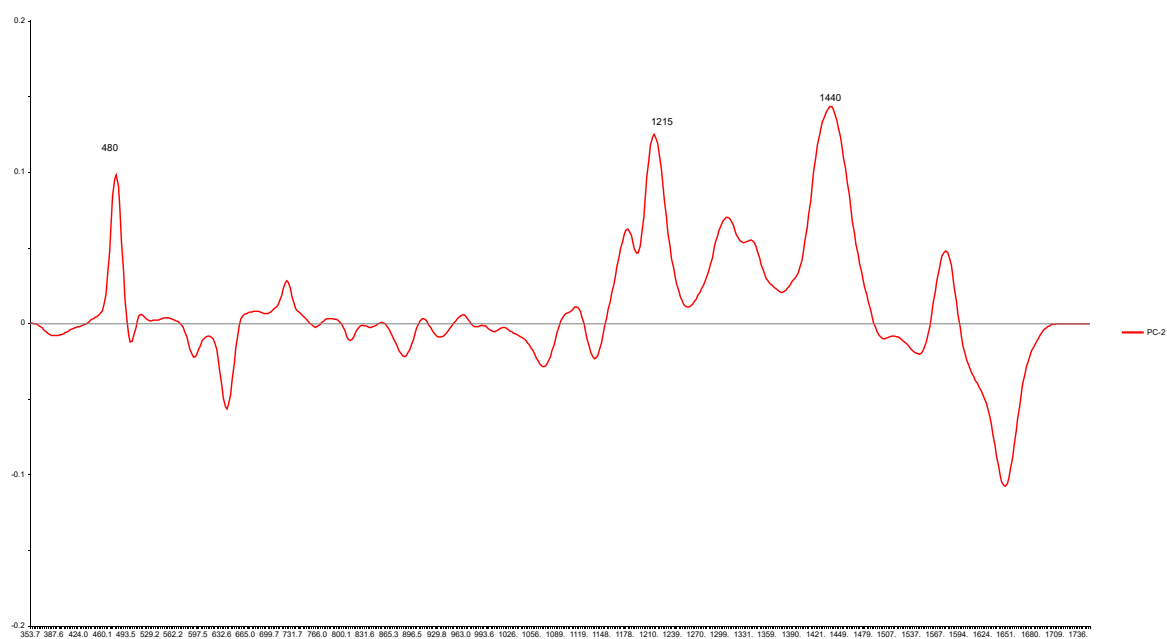

**Figure S9** Loading plot for PC12 for raw data

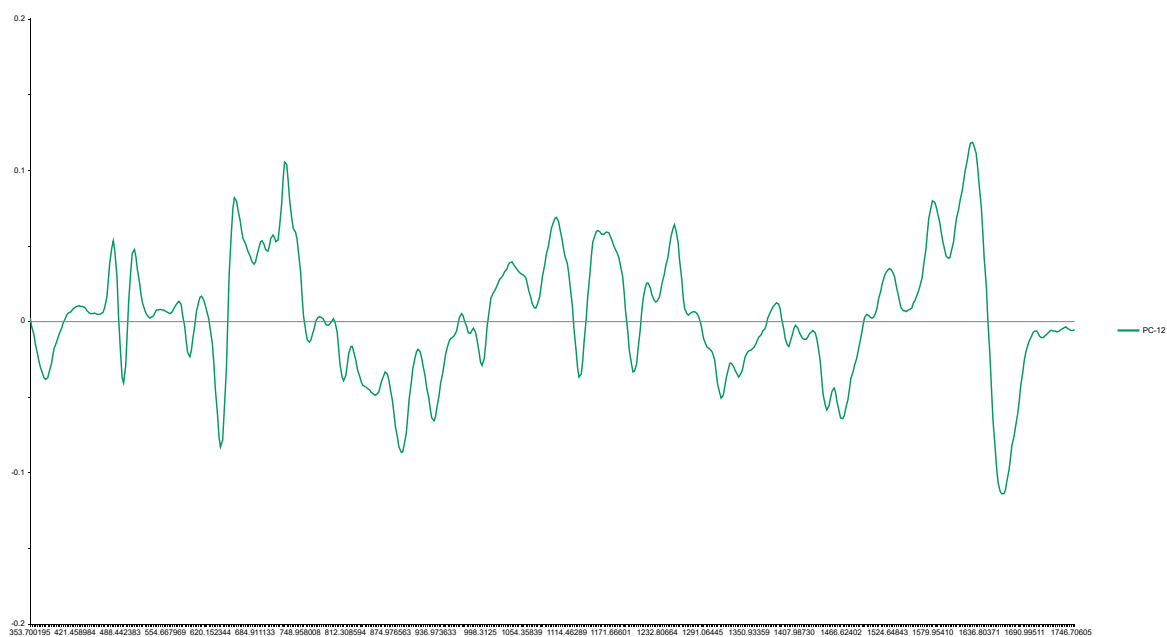

**Table S4.** Discrimination accuracy as a function of the number of components and the discrimination function.

| No of components | Discrimination function | TP | TN | FP | FN | Sensitivity | Specificity | Accuracy |
|------------------|-------------------------|----|----|----|----|-------------|-------------|----------|
| 5                | Linear                  | 35 | 32 | 13 | 15 | 0.7         | 0.71        | 0.71     |
|                  | Quadratic               | 25 | 40 | 5  | 25 | 0.5         | 0.89        | 0.68     |
|                  | Mahalanobis             | 47 | 22 | 23 | 3  | 0.94        | 0.49        | 0.73     |
| 7                | Linear                  | 34 | 32 | 13 | 16 | 0.68        | 0.71        | 0.69     |
|                  | Quadratic               | 41 | 38 | 7  | 9  | 0.82        | 0.84        | 0.83     |
|                  | Mahalanobis             | 49 | 24 | 21 | 1  | 0.98        | 0.53        | 0.77     |
| 8                | Linear                  | 34 | 31 | 14 | 16 | 0.68        | 0.69        | 0.68     |
|                  | Quadratic               | 42 | 40 | 5  | 8  | 0.84        | 0.89        | 0.86     |
|                  | Mahalanobis             | 49 | 22 | 23 | 1  | 0.98        | 0.49        | 0.75     |
| 9                | Linear                  | 34 | 37 | 8  | 16 | 0.68        | 0.82        | 0.75     |
|                  | Quadratic               | 46 | 39 | 6  | 4  | 0.92        | 0.87        | 0.89     |
|                  | Mahalanobis             | 49 | 30 | 15 | 1  | 0.98        | 0.67        | 0.83     |
| 10               | Linear                  | 41 | 40 | 5  | 9  | 0.82        | 0.89        | 0.85     |
|                  | Quadratic               | 49 | 42 | 3  | 1  | 0.98        | 0.93        | 0.96     |
|                  | Mahalanobis             | 50 | 32 | 13 | 0  | 1           | 0.71        | 0.86     |
| 11               | Linear                  | 43 | 42 | 3  | 7  | 0.86        | 0.93        | 0.89     |
|                  | Quadratic               | 50 | 43 | 2  | 0  | 1           | 0.96        | 0.98     |
|                  | Mahalanobis             | 50 | 34 | 11 | 0  | 1           | 0.76        | 0.88     |
| 12               | Linear                  | 44 | 43 | 2  | 6  | 0.88        | 0.96        | 0.92     |
|                  | Quadratic               | 50 | 45 | 0  | 0  | 1           | 1.00        | 1.00     |
|                  | Mahalanobis             | 50 | 34 | 11 | 0  | 1           | 0.76        | 0.88     |

TP= true positive; TN=true negative; FP=false positive; FN=false negative; Sensitivity=TP/(TP+FN); Specificity=TN/(TN+FP); Accuracy=(TP+TN)/(TP+TN+FP+FN)

**Table S5** Accuracy of discrimination of RCC samples for different preprocessing steps, using LDA-PCA with 12 components

| Preprocessing step | No preprocessing | Vector normalization | SNV | Area normalization |
|--------------------|------------------|----------------------|-----|--------------------|
| Accuracy           | 100%             | 96%                  | 96% | 98%                |

**Figure S10.** Loadings plot of the first component (PC1) showing the contribution of the variables to this component, within the PCA, applied for area normalized data

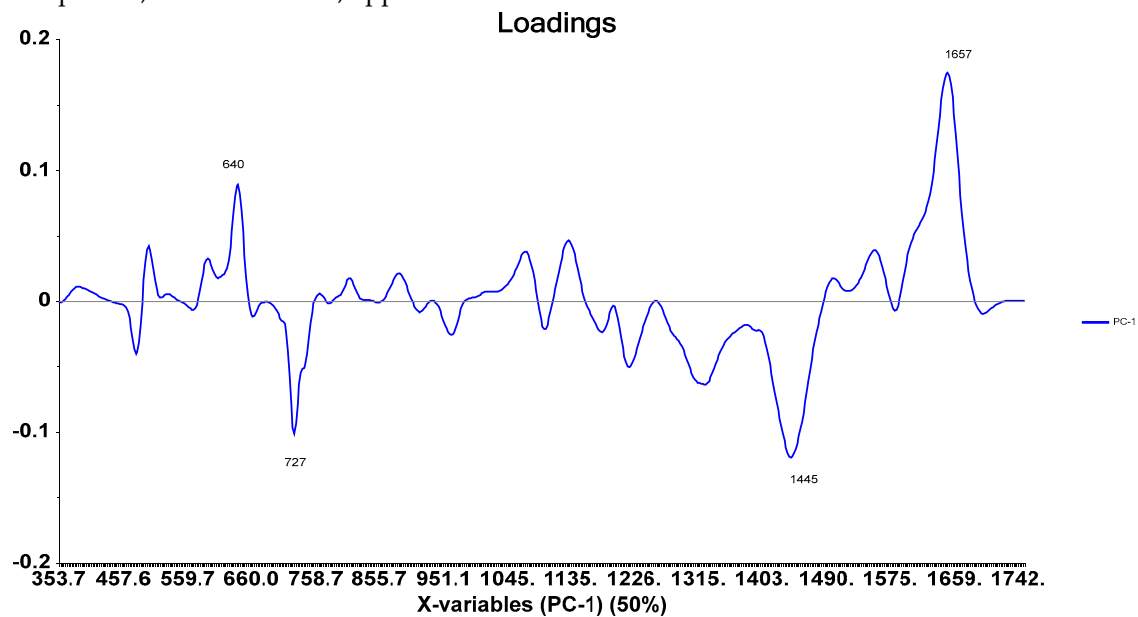

**Figure S11.** Loadings plot of the second component (PC2) showing the contribution of the variables to this component, within the PCA, applied for area normalized data

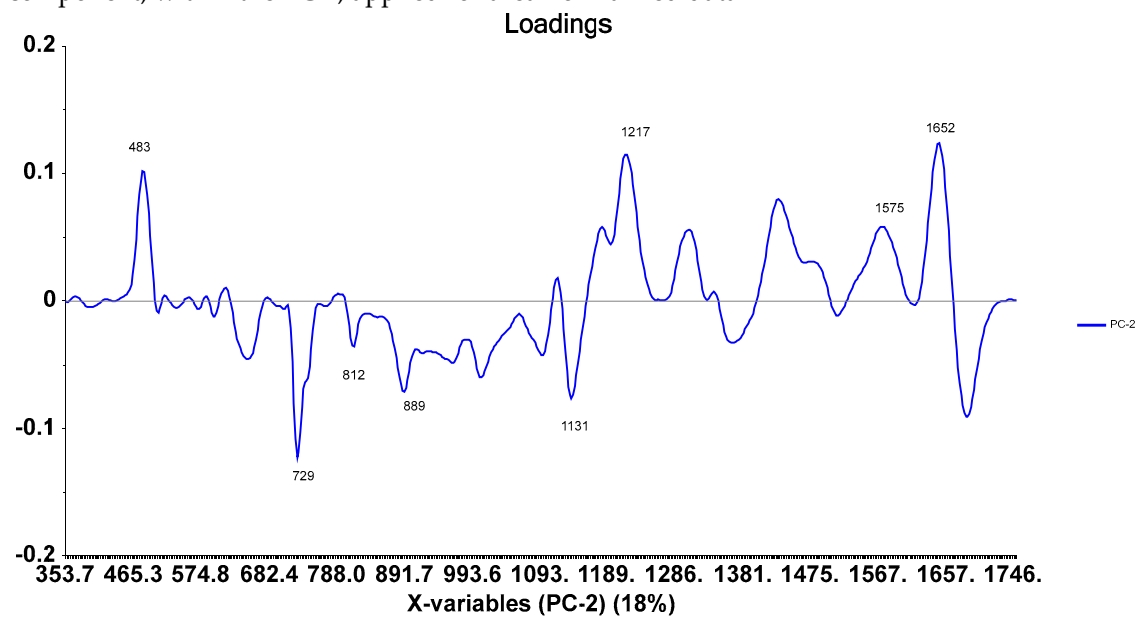

Supplement: s1 [file s1]
